# Supplementary material for: Birthing partners - validation of a questionnaire to assess the well-being of support persons
Source: Springer Nature journal article supplement (doi:10.1186/s12884-025-07685-y), 2025-05-10
Supplement: MOESM1 [file 12884_2025_7685_MOESM1_ESM.pdf]

|                                                                                               |
|-----------------------------------------------------------------------------------------------|
| <b>Additional file 1.</b> English translation of the questionnaire scales and items.          |
|                                                                                               |
| <b>Informedness</b>                                                                           |
| I usually had the feeling that I knew what was happening.                                     |
| I usually knew what I could do to support the woman giving birth.                             |
| I felt prepared for what can happen/has happened during the birth.                            |
| I felt prepared for what might happen/what happened during the birth.                         |
| Most of the time I knew how the birth would proceed.                                          |
| At least once I had the feeling that I had no control over the situation.                     |
| <b>Interaction with the midwife</b>                                                           |
| I wish the midwife had listened to me more.                                                   |
| I felt supported by the midwife.                                                              |
| The midwife gave me enough information about what she is doing and will do.                   |
| I would have liked the midwife to involve me more in decisions.                               |
| The midwife showed me how to support the woman giving birth.                                  |
| There were situations in which I would have liked the midwife to give me more information.    |
| I would have liked the midwife to be in the room more often.                                  |
| I felt involved in decisions by the midwife.                                                  |
| The midwife offered me something to drink or eat or asked me what I needed.                   |
| <b>Interaction with physicians</b>                                                            |
| The medical staff has informed me sufficiently about what it does and will do.                |
| I would have liked the medical staff to show me what I could do.                              |
| I would have liked the medical staff to be present in the room more often.                    |
| The medical staff gave the woman giving birth and me the opportunity to help shape the birth. |
| I felt the medical staff involved me in decisions.                                            |
| Someone from the medical showed me how to support the woman giving birth.                     |
| <b>Belonging</b>                                                                              |
| I felt like I didn't belong.                                                                  |
| I have fulfilled my own expectations of myself as a support person.                           |
| I felt myself to be involved in the birth.                                                    |
| I was able to give good support to the woman giving birth well.                               |
| <b>Feelings</b>                                                                               |
| I felt the need to suppress any feelings that arose.                                          |
| I felt that I had to suppress any feelings that arose.                                        |
| I was overwhelmed by the situation.                                                           |
| I was afraid.                                                                                 |
| I was worried about the duration of the birth.                                                |
| I was worried about the pain of the women giving birth.                                       |
